# Supplementary material for: Combined morphological and phylogenomic re-examination of malawimonads, a critical taxon for inferring the evolutionary history of eukaryotes
Source: PubMed Central journal article supplement (PMC5936906; doi:10.1098/rsos.171707), 2018-04-04
Supplement: rsos171707supp5.pdf [file rsos171707supp5.pdf]

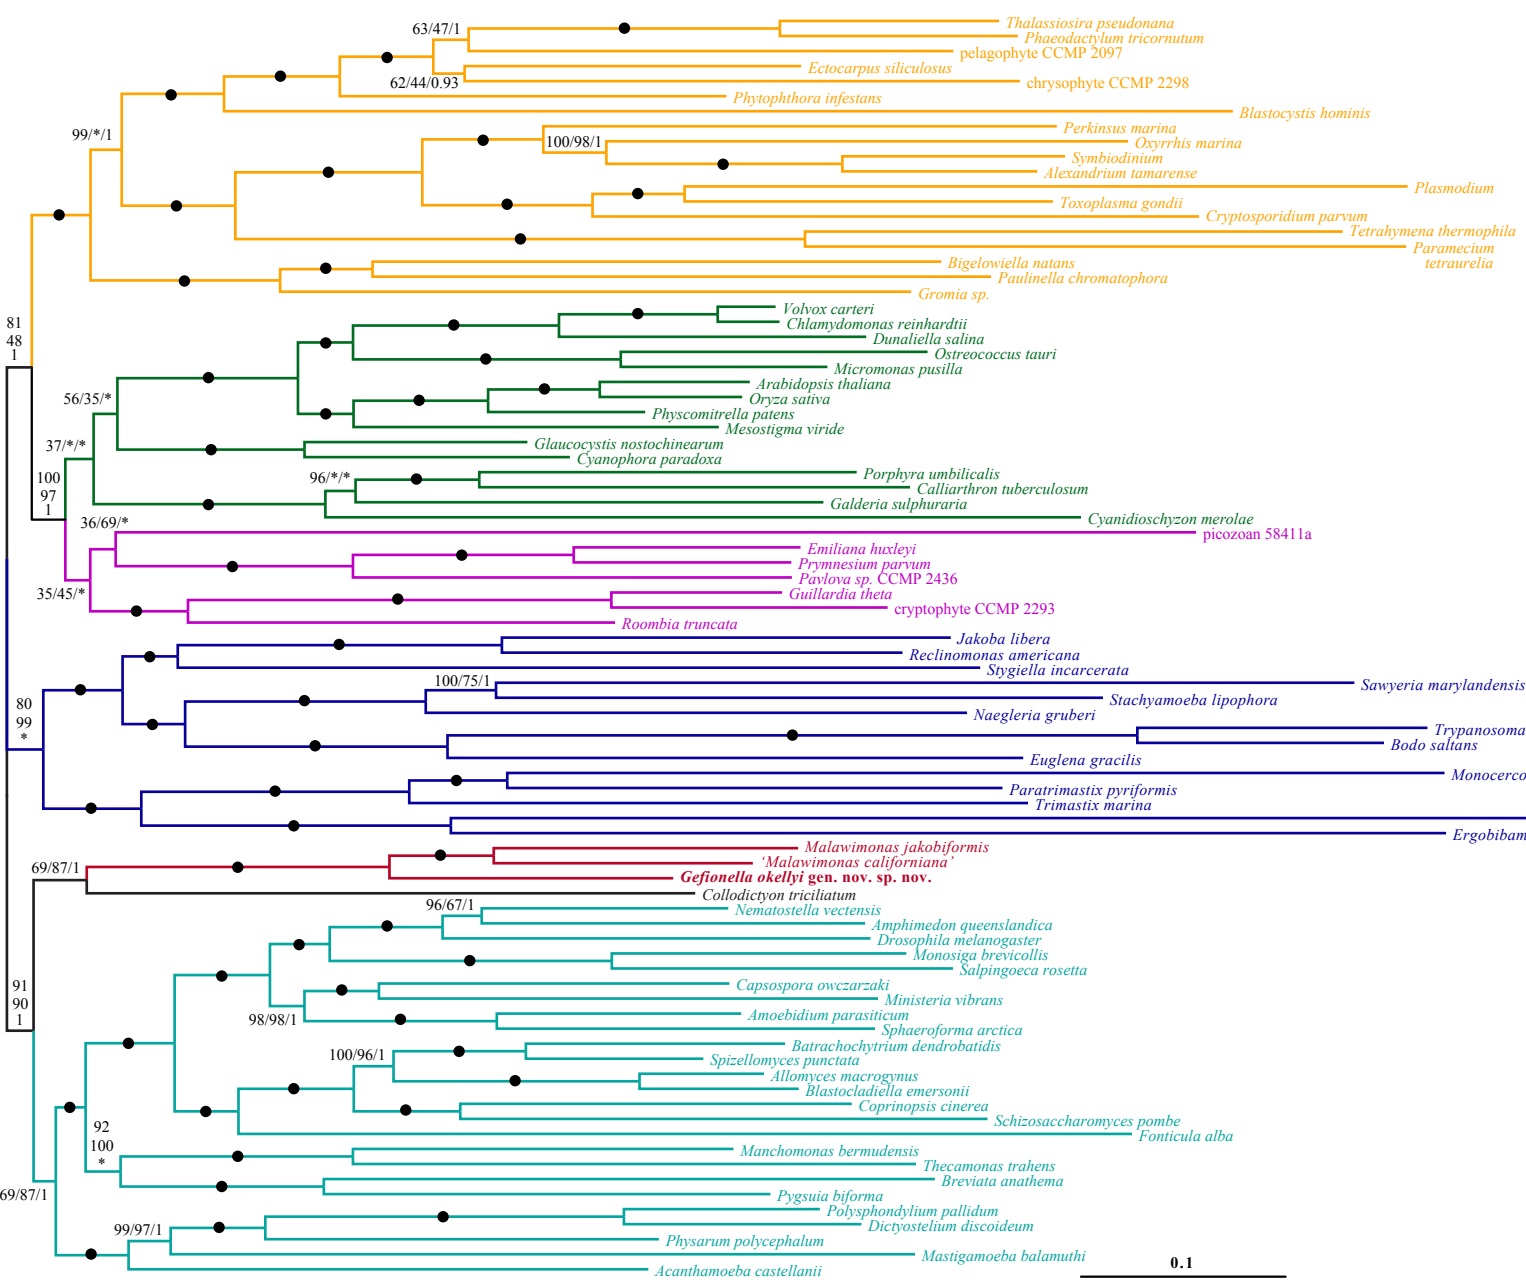

Stramenopiles

Alveolata

Rhizaria

Chloroplastida

Glaucophyta

Rhodophyta

Picozoan

Haptophyta

Cryptista

Sar

Archaeplastida

Discoba

Metamonada

Malawimonadidae  
Collodictyon

Opisthokonta

Apusomonadida

Breviatea

Amoebozoa

Diaphoretickes

Excavata\*

Amorphea

0.1
